# Supplementary material for: A guilt-free strategy increases self-reported non-compliance with COVID-19 preventive measures: Experimental evidence from 12 countries
Source: PLOS journal article supplement (doi:10.1371/journal.pone.0249914), 2021-04-21
Supplement: S1 (10.1371/journal.pone.0249914.s001) [file journal.pone.0249914.s001]

## **S1 File**

A Guilt-Free Strategy Increases Self-Reported Non-Compliance with COVID-19 Preventive Measures: Experimental Evidence from 12 Countries

*PLOS One*

## Appendix A: Description of the samples and national contexts

**Table A.1.** Description of the samples

| Country        | Dates on the field                        | Number of observations |
|----------------|-------------------------------------------|------------------------|
| Australia      | June, 15 <sup>th</sup> – 19 <sup>th</sup> | 1,003                  |
| Austria        | June, 23 <sup>rd</sup> – 27 <sup>th</sup> | 1,011                  |
| Brazil         | June, 23 <sup>rd</sup> – 28 <sup>th</sup> | 1,000                  |
| France         | June, 22 <sup>nd</sup> – 25 <sup>th</sup> | 1,006                  |
| Germany        | June, 23 <sup>rd</sup> – 27 <sup>th</sup> | 1,004                  |
| Italy          | June, 24 <sup>th</sup> – 27 <sup>th</sup> | 1,003                  |
| New Zealand    | June, 23 <sup>rd</sup> – 28 <sup>th</sup> | 1,000                  |
| Poland         | June, 24 <sup>th</sup> – 27 <sup>th</sup> | 1,014                  |
| Spain          | July, 6 <sup>th</sup> – 10 <sup>th</sup>  | 961                    |
| Sweden         | June, 23 <sup>rd</sup> – 27 <sup>th</sup> | 1,017                  |
| United Kingdom | June, 21 <sup>st</sup> – 24 <sup>th</sup> | 1,014                  |
| United States  | June, 16 <sup>th</sup> – 22 <sup>nd</sup> | 1,001                  |
| Canada*        | June, 16 <sup>th</sup> – 24 <sup>th</sup> | 1,002                  |

*Note.* \*: used for robustness checks only.

**Table A.2.** Population and mortality rate across countries

| Country        | Population (million) | COVID-19 Mortality rate per<br>100 000 inhabitants (June 15) |
|----------------|----------------------|--------------------------------------------------------------|
| Australia      | 25.36                | 0.40                                                         |
| Austria        | 8.87                 | 7.63                                                         |
| Brazil         | 211.05               | 20.82                                                        |
| France         | 67.06                | 43.80                                                        |
| Germany        | 83.13                | 10.59                                                        |
| Italy          | 60.29                | 57.00                                                        |
| New Zealand    | 4.91                 | 0.44                                                         |
| Poland         | 37.97                | 3.30                                                         |
| Spain          | 47.07                | 57.64                                                        |
| Sweden         | 10.28                | 47.55                                                        |
| US             | 328.24               | 36.19                                                        |
| United Kingdom | 66.83                | 58.94                                                        |
| Canada*        | 37.58                | 21.88                                                        |

*Note: Source for the population is the World Bank and the Mortality rates and computed using John Hopkins Coronavirus Resource Center data (accessible on github). \*: used for robustness checks only.*

**Table A.3. COVID-19 Preventive Measures across countries**

|                       | Mandatory use of masks                                                                  |                                                                                  | Mandatory physical distancing |                                              | Stay at home requirement                                                                              |                                              |
|-----------------------|-----------------------------------------------------------------------------------------|----------------------------------------------------------------------------------|-------------------------------|----------------------------------------------|-------------------------------------------------------------------------------------------------------|----------------------------------------------|
|                       | in shops and public transportation                                                      |                                                                                  | Policy                        | Scope                                        | Policy                                                                                                | Scope                                        |
|                       | Policy                                                                                  | Scope                                                                            | Policy                        | Scope                                        | Policy                                                                                                | Scope                                        |
| <b>Australia</b>      | No                                                                                      | National                                                                         | Yes                           | National                                     | No                                                                                                    | National                                     |
| <b>Austria</b>        | In public transportation                                                                | National                                                                         | Yes                           | National                                     | No                                                                                                    | National                                     |
| <b>Brazil</b>         | In shops and/or public transportation                                                   | In specific areas in state or in whole state                                     | Yes                           | In specific areas in state or in whole state | Require not leaving house with exceptions for daily exercise, grocery shopping, and 'essential' trips | In specific areas                            |
| <b>France</b>         | In public transportation                                                                | National                                                                         | Yes                           | National                                     | No                                                                                                    | National                                     |
| <b>Germany</b>        | In public transportation and shops                                                      | National (agreement of federal and state governments) / all states except Berlin | Yes                           | National                                     | No                                                                                                    | National                                     |
| <b>Italy</b>          | In shops and public transportation                                                      | National                                                                         | Yes                           | National                                     | Recommend not leaving house                                                                           | National                                     |
| <b>New Zealand</b>    | No                                                                                      | National                                                                         | No                            | National                                     | No                                                                                                    | National                                     |
| <b>Poland</b>         | In shops and public transportation                                                      | National                                                                         | yes                           | National                                     | No                                                                                                    | National                                     |
| <b>Spain</b>          | In shops and restaurants; also in all public spaces when social distancing not possible | Specific regions / national                                                      | Yes                           | National                                     | Recommend not leaving house                                                                           | In specific regions                          |
| <b>Sweden</b>         | No                                                                                      | National                                                                         | No                            | National                                     | Recommend not leaving house                                                                           | National                                     |
| <b>United Kingdom</b> | In public transportation                                                                | National                                                                         | Yes                           | National                                     | Recommend not leaving house                                                                           | In specific areas                            |
| <b>United States</b>  | In shops and/or public transportation                                                   | In specific areas in state or in whole state                                     | Yes                           | In specific areas in state or in whole state | Require not leaving house with exceptions for daily exercise, grocery shopping, and 'essential' trips | In specific areas in state or in whole state |
| <b>Canada*</b>        | For air passengers / in shops and public transportation                                 | National / in some provinces or in specific areas of some provinces              | Yes                           | National                                     | Recommend not leaving house                                                                           | National                                     |

Source: <https://github.com/amel-github/covid19-interventionmeasures>; <https://masks4all.co/what-countries-require-masks-in-public>; <https://airtable.com/shrxEdbaBJIQwMUgA/tbl5o6qUd54BL9wkw>; <https://www.bsg.ox.ac.uk/research/research-projects/coronavirus-government-response-tracker>; <https://kubinec.shinyapps.io/coronanet/>; and further authors' corroborations with official and media sources.

# Appendix B: Descriptive statistics, by country

Figure B.1. Non-compliance with preventive measures

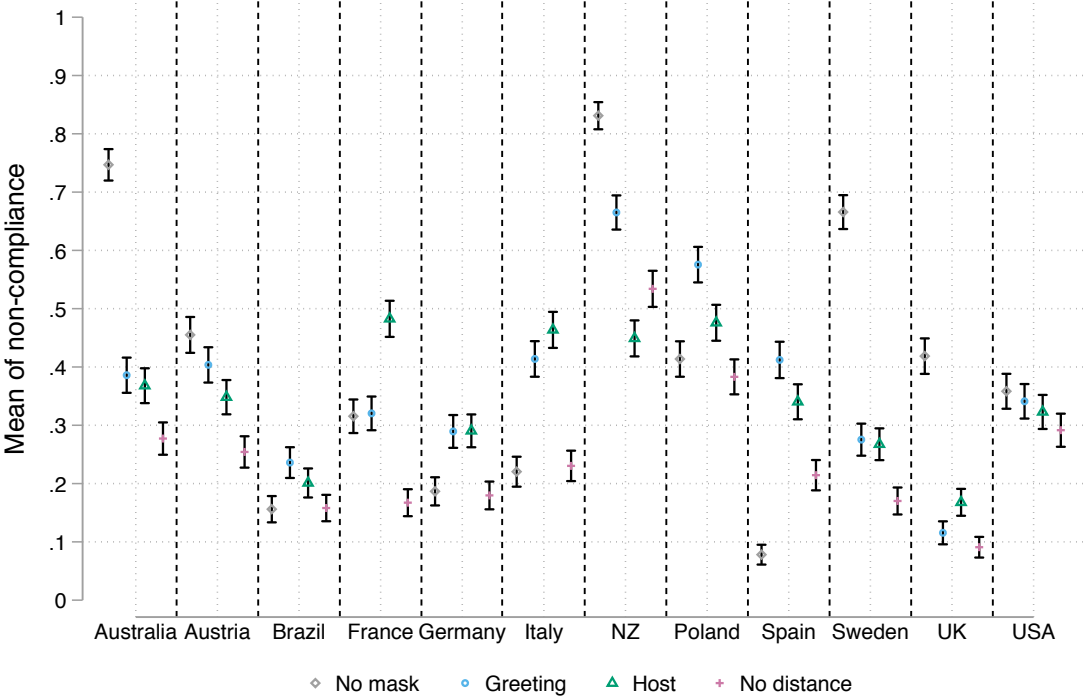

Note: Means are shown for each item in each country, with 95% confidence intervals included.

**Figure B.2.** Non-compliance, by guilt-free answer choices

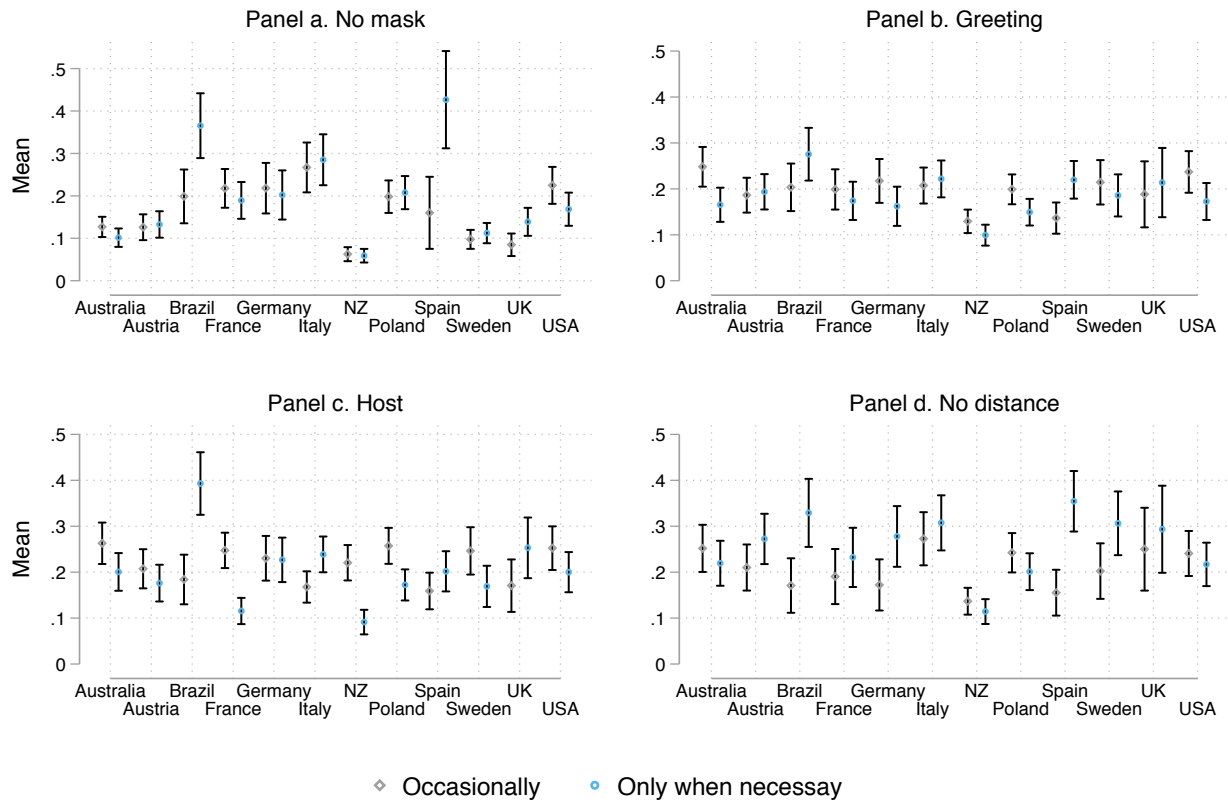

Note: Means are shown for each item and guilt-free answer choices, with 95% confidence intervals included.

**Table B.1.** Descriptive statistics for age, gender and education.

|           | Australia |           | Austria |           | Brazil |           | France |           | Germany |           | Italy |           |
|-----------|-----------|-----------|---------|-----------|--------|-----------|--------|-----------|---------|-----------|-------|-----------|
|           | Mean      | Std. Dev. | Mean    | Std. Dev. | Mean   | Std. Dev. | Mean   | Std. Dev. | Mean    | Std. Dev. | Mean  | Std. Dev. |
| Age       | 46.64     | 14.43     | 47.30   | 16.47     | 41.33  | 15.01     | 3.97   | 1.70      | 51.02   | 15.91     | 47.68 | 16.48     |
| Gender    | 0.52      | 0.50      | 0.47    | 0.50      | 0.52   | 0.50      | 0.49   | 0.50      | 0.51    | 0.50      | 0.53  | 0.50      |
| Education | 0.46      | 0.27      | 0.49    | 0.22      | 0.63   | 0.15      | 0.72   | 0.31      | 0.62    | 0.28      | 0.57  | 0.19      |
|           | NZ        |           | Poland  |           | Spain  |           | Sweden |           | UK      |           | USA   |           |
|           | Mean      | Std. Dev. | Mean    | Std. Dev. | Mean   | Std. Dev. | Mean   | Std. Dev. | Mean    | Std. Dev. | Mean  | Std. Dev. |
| Age       | 48.37     | 15.58     | 43.96   | 15.37     | 48.27  | 17.54     | 51.45  | 16.14     | 46.65   | 16.03     | 46.41 | 17.90     |
| Gender    | 0.53      | 0.50      | 0.53    | 0.50      | 0.52   | 0.50      | 0.49   | 0.50      | 0.51    | 0.50      | 0.53  | 0.50      |
| Education | 0.55      | 0.26      | 0.71    | 0.26      | 0.54   | 0.19      | 0.65   | 0.34      | 0.61    | 0.29      | 0.58  | 0.21      |

Note: For gender, female=1

## Appendix C. Regression tables

**Table C.1.** Regressions outputs for panel a of Figure 2

|                           | Face mask       | Greeting        | Host            | Distance        |
|---------------------------|-----------------|-----------------|-----------------|-----------------|
| Gender (1=Female)         | -0.14<br>(0.05) | -0.08<br>(0.06) | -0.03<br>(0.06) | -0.22<br>(0.07) |
| Treatment                 | 0.40<br>(0.05)  | 0.48<br>(0.05)  | 0.76<br>(0.06)  | 0.78<br>(0.06)  |
| Gender $\times$ Treatment | -0.05<br>(0.07) | 0.09<br>(0.08)  | -0.07<br>(0.08) | 0.02<br>(0.09)  |
| Constant                  | -0.50<br>(0.04) | -0.77<br>(0.04) | -0.99<br>(0.04) | -1.44<br>(0.05) |
| Observations              | 12026           | 12026           | 12023           | 12028           |

*Note:* Logistic regression coefficients with standard errors in parentheses.

**Table C.2.** Regressions outputs for panel b of Figure 2

|                        | Face mask           | Greeting            | Host                | Distance            |
|------------------------|---------------------|---------------------|---------------------|---------------------|
| Age                    | -0.0089<br>(0.0017) | -0.0284<br>(0.0018) | -0.0168<br>(0.0018) | -0.0316<br>(0.0022) |
| Treatment              | 0.5295<br>(0.1151)  | 0.6885<br>(0.1200)  | 0.9339<br>(0.1202)  | 0.8246<br>(0.1327)  |
| Age $\times$ Treatment | -0.0032<br>(0.0023) | -0.0028<br>(0.0025) | -0.0042<br>(0.0025) | 0.0002<br>(0.0029)  |
| Constant               | -0.1536<br>(0.0822) | 0.5044<br>(0.0859)  | -0.2233<br>(0.0881) | -0.1353<br>(0.1009) |
| Observations           | 12026               | 12026               | 12023               | 12028               |

*Note:* Logistic regression coefficients with standard errors in parentheses.

**Table C.3.** Regressions outputs for panel c of Figure 2

|                              | Face mask       | Greeting        | Host            | Distance        |
|------------------------------|-----------------|-----------------|-----------------|-----------------|
| Education                    | -0.24<br>(0.10) | 0.22<br>(0.11)  | 0.24<br>(0.11)  | 0.21<br>(0.13)  |
| Treatment                    | 0.23<br>(0.09)  | 0.63<br>(0.09)  | 0.69<br>(0.10)  | 0.71<br>(0.11)  |
| Education $\times$ Treatment | 0.24<br>(0.14)  | -0.17<br>(0.14) | 0.05<br>(0.15)  | 0.12<br>(0.17)  |
| Constant                     | -0.44<br>(0.07) | -0.94<br>(0.07) | -1.15<br>(0.07) | -1.68<br>(0.09) |
| Observations                 | 11946           | 11946           | 11943           | 11948           |

*Note:* Logistic regression coefficients with standard errors in parentheses.

# Appendix D. Robustness checks

Figure D.1. Replication of Figure 1 with weights

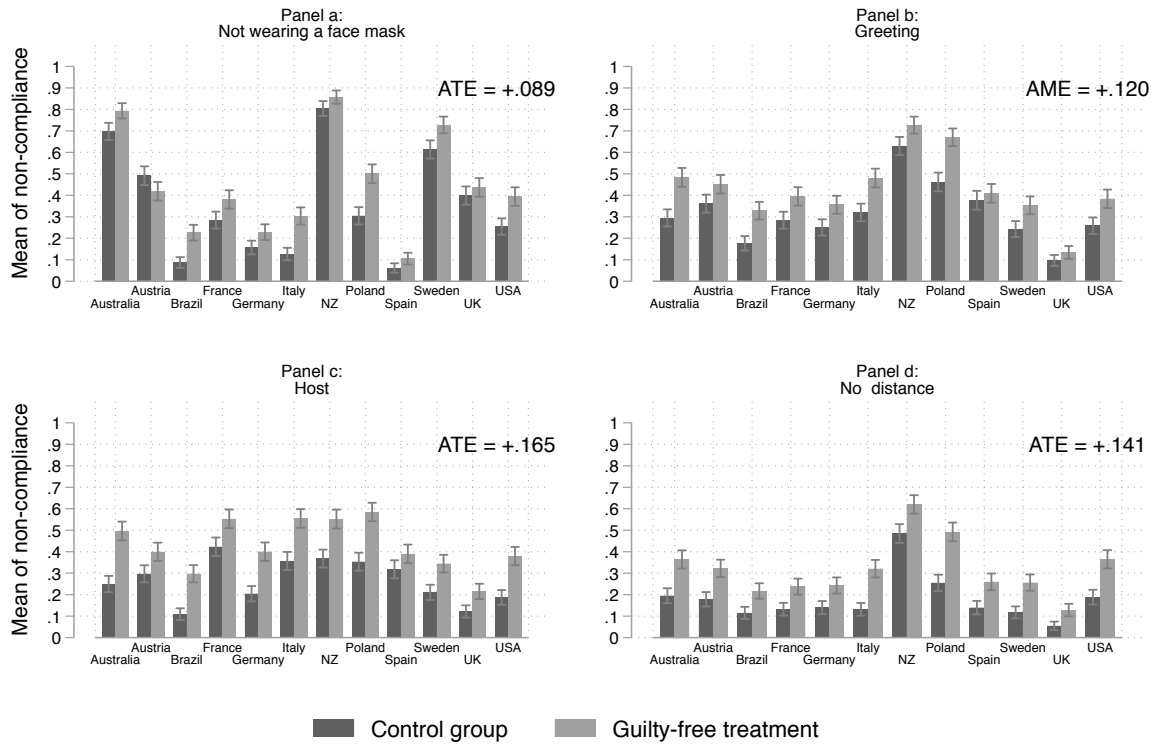

Note: Means of non-compliance are shown with 95% confidence intervals included. ATE=Average treatment effect.



**Figure D.2.** Replication of Figure 2 with weights

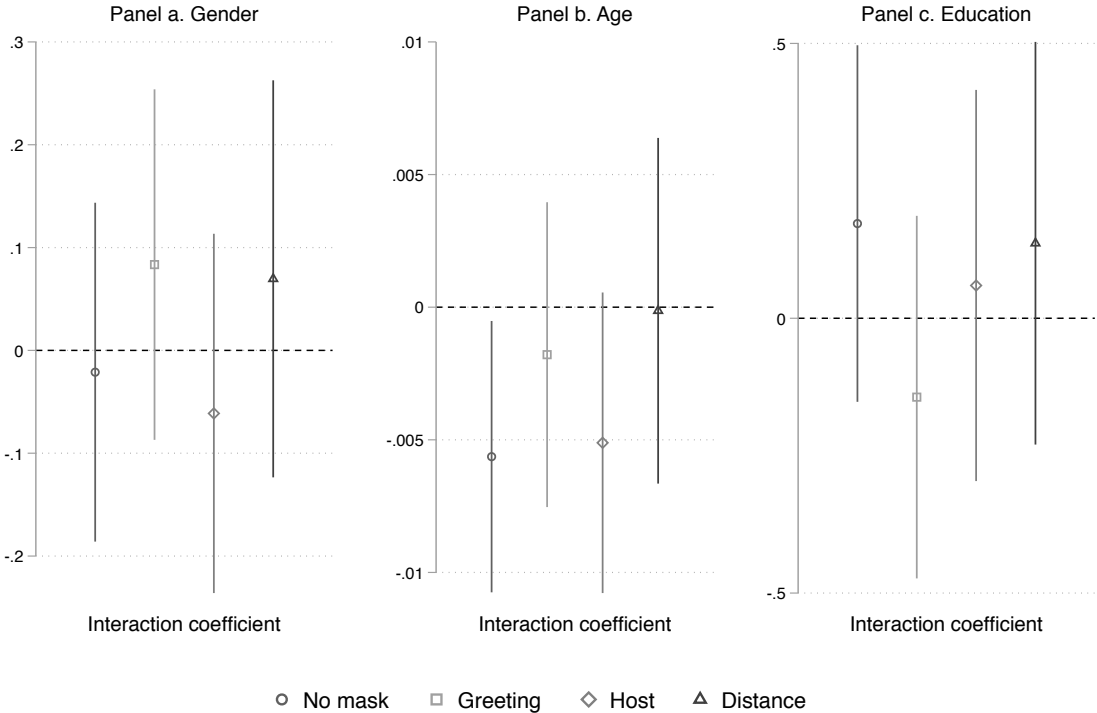

*Note: The values of the interaction coefficients with 95% confidence intervals included.*

**Figure D.3.** Average treatment effects controlling for country fixed effects

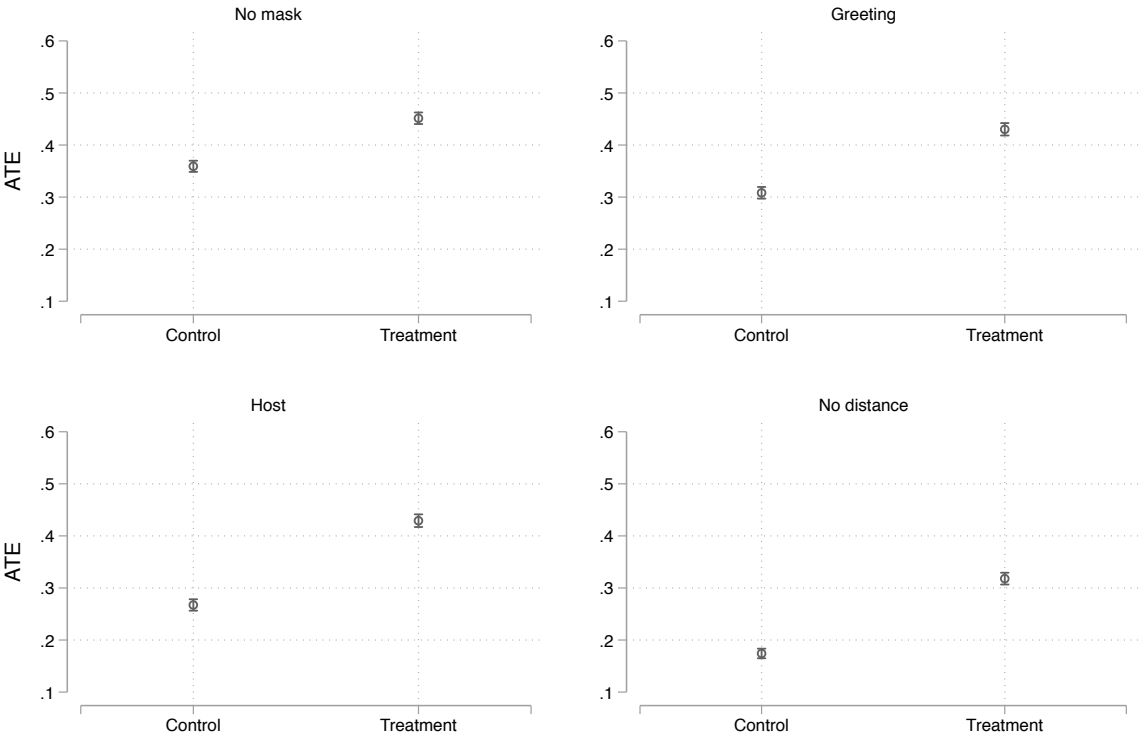

*Note: Average treatment effects are estimated from Table D.1. and are shown with 95% confidence intervals included.*

**Table D.1.** Regressions models with country fixed effects

| <i>Dependent variable =</i> | No mask         | Greeting        | Host            | No distance     |
|-----------------------------|-----------------|-----------------|-----------------|-----------------|
| Guilt-free treatment        | 0.49<br>(0.04)  | 0.58<br>(0.04)  | 0.76<br>(0.04)  | 0.86<br>(0.05)  |
| Austria                     | -1.28<br>(0.10) | 0.07<br>(0.09)  | -0.09<br>(0.09) | -0.12<br>(0.10) |
| Brazil                      | -2.81<br>(0.11) | -0.72<br>(0.10) | -0.86<br>(0.10) | -0.74<br>(0.11) |
| France                      | -1.88<br>(0.10) | -0.29<br>(0.09) | 0.49<br>(0.09)  | -0.67<br>(0.11) |
| Germany                     | -2.58<br>(0.11) | -0.44<br>(0.10) | -0.37<br>(0.10) | -0.58<br>(0.11) |
| Italy                       | -2.38<br>(0.11) | 0.12<br>(0.09)  | 0.41<br>(0.09)  | -0.26<br>(0.10) |
| New Zealand                 | 0.52<br>(0.11)  | 1.18<br>(0.09)  | 0.35<br>(0.09)  | 1.15<br>(0.10)  |
| Poland                      | -1.45<br>(0.10) | 0.78<br>(0.09)  | 0.46<br>(0.09)  | 0.50<br>(0.10)  |
| Spain                       | -3.60<br>(0.14) | 0.11<br>(0.09)  | -0.13<br>(0.10) | -0.36<br>(0.11) |
| Sweden                      | -0.40<br>(0.10) | -0.51<br>(0.10) | -0.48<br>(0.10) | -0.64<br>(0.11) |
| United Kingdom              | -1.43<br>(0.10) | -1.59<br>(0.12) | -1.09<br>(0.11) | -1.38<br>(0.13) |
| United States               | -1.69<br>(0.10) | -0.19<br>(0.09) | -0.19<br>(0.10) | 0.09<br>(0.10)  |
| Constant                    | 0.85<br>(0.08)  | -0.76<br>(0.07) | -0.94<br>(0.07) | -1.43<br>(0.08) |
| Observations                | 12026           | 12026           | 12023           | 12028           |

*Note.* Logistic regression predicting non-compliance. Standard errors in parentheses. The reference category for the countries is Australia.

**Figure D.4.** Prohibited and non-prohibited (placebo) items

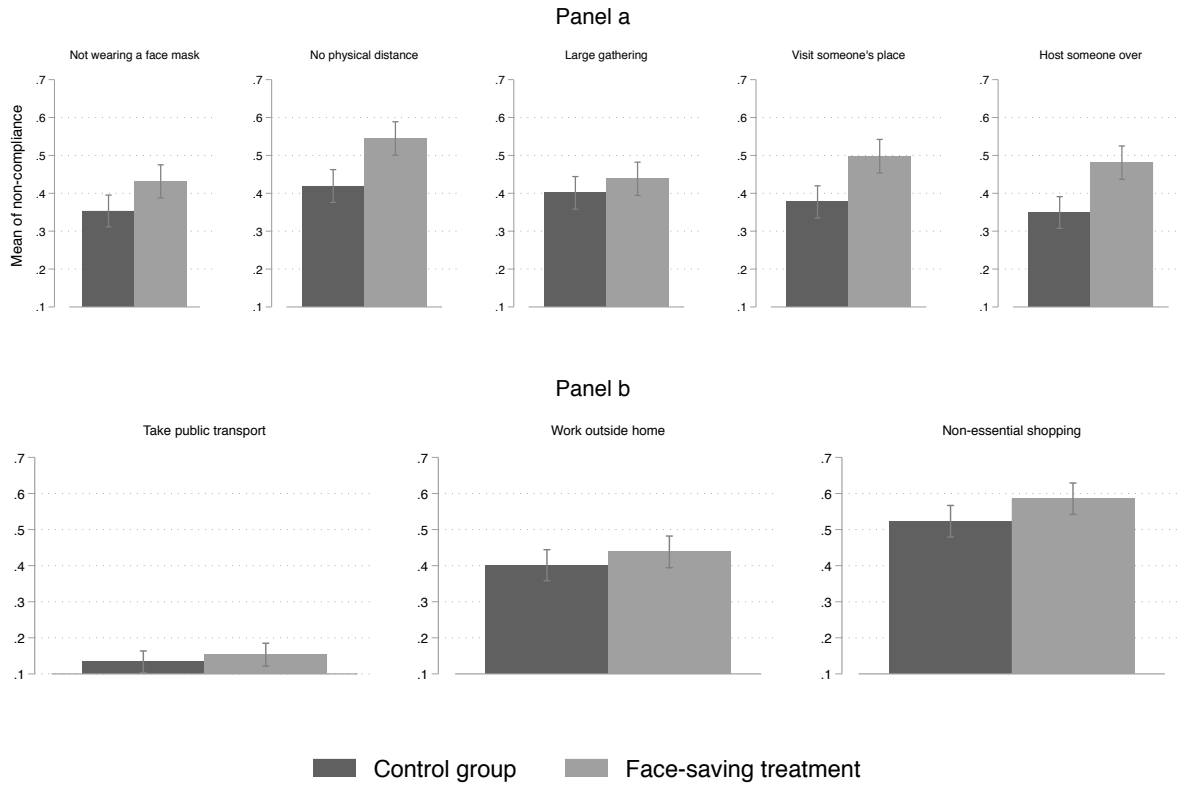

*Note: Means of non-compliance are shown with 95% confidence intervals included.*

**Figure D.5.** Comparison with other estimation techniques

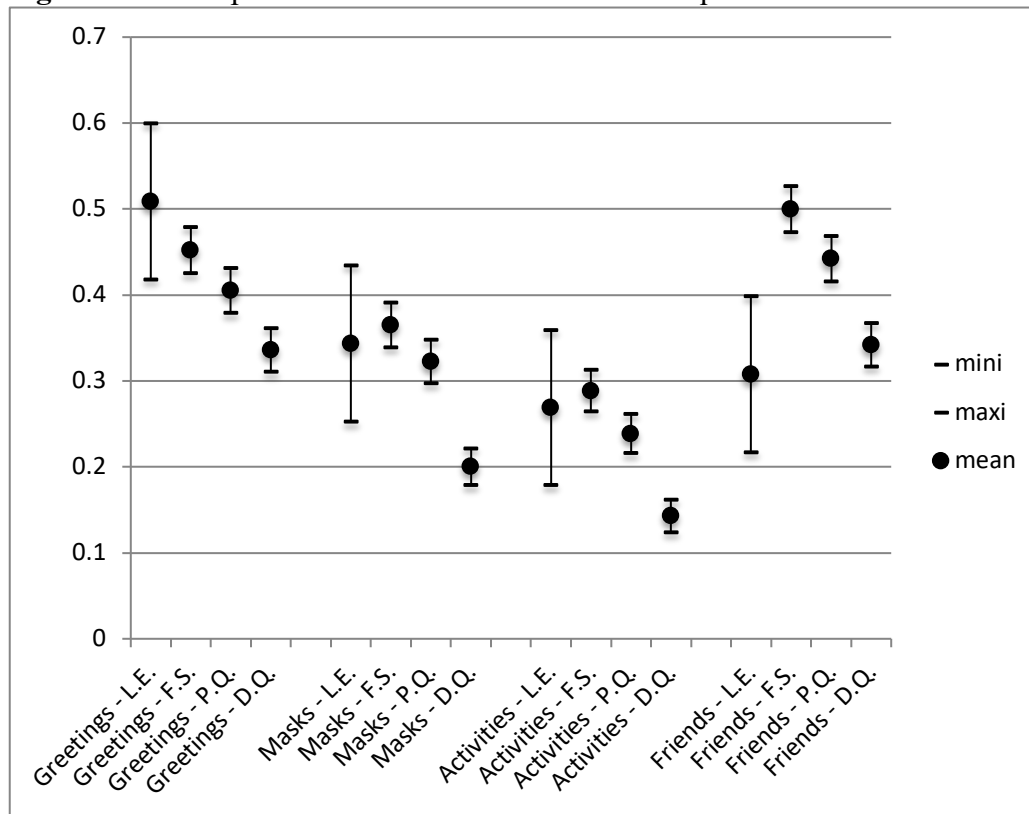

Note: Means with 95% confidence intervals are shown. D.Q. indicates estimation from the “dichotomous” question format; P.Q. indicates estimation from the “polytomous” question format; F.S. indicates estimation from the “face saving” question format; L.E. indicates estimation from the list-experiment estimation strategy. Masks refers to the following items: Go shopping or take public transportation without a face mask or taking it off during it; Greetings refers to the following items: Meet friends, family or colleagues greeting them by shaking hands, hugging or kissing; Activities refers to the following items: Participate in social activities (work, sport, religious ceremony...) without respecting physical distancing. Friends refers to the following items: Have a group of friends or family over at your place without respecting physical distancing.

Data: We ran a quota-based online survey in France that was in field from July 9-19<sup>th</sup>. As nearly all surveys in France, sampling was done using a quota method based on age, gender, occupation, regions and type of residential area. The sample is designed to be representative of the electorate’s features in each of the 12 metropolitan French regions. 10,686 respondents answered our questionnaire.

The same four items included in the survey were:

- Go shopping or take public transportation without a face mask or taking it off during it;
- Meet friends, family or colleagues greeting them by shaking hands, hugging or kissing;
- Have a group of friends or family over at your place without respecting physical distancing;
- Participate in social activities (work, sport, religious ceremony...) without respecting physical distancing.

We used four different strategies to address the issue of social desirability. Three approaches focusing on the question wording and answer options, and a list-experimental approach:

- First, a set of 1343 respondents were exposed to the following “dichotomous” question wording discussed by Daoust et al. (2020): “Have you done any of the following activities in the last week?”. The response categories were (1) yes, (2) no.
- Second we administered to another group of 1337 respondents the “polytomous” question used by Munzert & Selb (2020) : “How often have you done the following activities in the last week?”. The response categories were (1) daily, (2) several times, (3) once, (4) never.
- The third type of questions included is the “face-saving” question proposed by Daoust et al. (2020): “Some people have altered their behaviour since the beginning of the pandemic, while others have continued to pursue various activities. Some may also want to change their behaviour but cannot do so for different reasons. Have you done any of the following activities in the last week?”. 1345 respondents were to choose between the following categories: (1) Yes, (2) Occasionally, (3) Only when necessary, (4) No.
- Finally, we also embedded a list experiment (Becher 2020; Larsen 2020; Munzert & Selb 2020) in this survey. Faced with a list of items, a fourth group of respondents were asked how many things they had done last week, but not which specific ones. Respondents were randomly assigned to either the control group (N=1334) or one of the four treatment groups (N=1332; N=1331; N=1335; N=1329). The treated groups received an additional item capturing the violation of the social distancing norm. The control group received a list of four behaviours that are generally permissible under existing health recommendations. The question reads as follow: “How many of these things have you done last week? You do not need to tell me which ones you have done, just how many.” The following four activities were listed: I went to the doctor or to the hospital; I watched a movie or TV show online using a streaming service (e.g., Amazon, Netflix); I exercised outdoors; I ordered food using an online delivery service. In addition to these four items, the treated groups received one of the four more sensitive items we study. The estimated level of non-compliance was obtained from the simple differences-in-means.

Turning to the results from these different approaches, as shown in Figure D.5., for 3 out of 4 items the level of non-compliance estimated by the face-saving question (the estimates denoted by F.S.) is in the 95% confidence interval of the level of non-compliance estimated by the list experiment (the estimates denoted by L.E.). For one item, the face-saving estimate is 4.5 points below and for both other ones it is 2 points higher. For the items related to mask-wearing, greetings and social-distancing in activities, estimates from the dichotomous questions are systematically below the list-experiment estimates and beyond its 95% confidence intervals. The “face-saving” treatment does not seem to induce a systematic experimenter demand effect that would inflate non-compliance, at least compared with an alternative measurement strategy - list experiment – that is well known for decreasing desirability bias (Blair and Imai 2012) and does not appear prone to any experimenter demand effect due to the lack of any associated framing.

The pattern described above differs only for non-compliance in social distancing while hosting friends. In this instance, the list experiment estimate is the lowest. Only the estimate from the dichotomous question does not statistically differ from it. Both the estimates of the face-saving and polytomous questions are significantly higher. The polytomous question is devoid of any framing in the wording of the question. Therefore, even if we have no explanation for this

idiosyncratic pattern, it is unlikely that the higher estimate produced by the face-saving question relative to the list experiment is due to a potential experimenter demand effect induced by the face-saving treatment.

Overall, even if this experiment only includes France, it brings no evidence of an experimenter demand effect that would systematically bias our estimates.

**Table D.2.** Romano-Wolf test for the “No Mask” item

|                | Model p-value | Resample p-value | Romano-Wolf p-value |
|----------------|---------------|------------------|---------------------|
| Australia      | 0.0039        | 0.0050           | 0.0200              |
| Austria        | 0.0156        | 0.0230           | 0.0509              |
| Brazil         | 0.0000        | 0.0010           | 0.0010              |
| France         | 0.0002        | 0.0020           | 0.0030              |
| Germany        | 0.0074        | 0.0060           | 0.0320              |
| Italy          | 0.0000        | 0.0010           | 0.0010              |
| New Zealand    | 0.0600        | 0.0619           | 0.1249              |
| Poland         | 0.0000        | 0.0010           | 0.0010              |
| Spain          | 0.0001        | 0.0010           | 0.0030              |
| Sweden         | 0.0000        | 0.0010           | 0.0020              |
| United Kingdom | 0.1295        | 0.1518           | 0.1518              |
| United States  | 0.0000        | 0.0010           | 0.0010              |

*Note: Default options from the rwolf package was used, with the number of repetitions set at 1000.*

**Table D.3.** Romano-Wolf test for the “Greeting” item

|                | Model p-value | Resample p-value | Romano-Wolf p-value |
|----------------|---------------|------------------|---------------------|
| Australia      | 0.0000        | 0.0010           | 0.0010              |
| Austria        | 0.0071        | 0.0080           | 0.0210              |
| Brazil         | 0.0000        | 0.0010           | 0.0010              |
| France         | 0.0004        | 0.0010           | 0.0010              |
| Germany        | 0.0001        | 0.0010           | 0.0010              |
| Italy          | 0.0000        | 0.0010           | 0.0010              |
| New Zealand    | 0.0002        | 0.0010           | 0.0010              |
| Poland         | 0.0000        | 0.0010           | 0.0010              |
| Spain          | 0.0132        | 0.0150           | 0.0260              |
| Sweden         | 0.0004        | 0.0010           | 0.0010              |
| United Kingdom | 0.0380        | 0.0360           | 0.0360              |
| United States  | 0.0001        | 0.0010           | 0.0010              |

*Note: Default options from the rwolf package was used, with the number of repetitions set at 1000.*



**Table D.4.** Romano-Wolf test for the “Host” item

|                | Model p-value | Resample p-value | Romano-Wolf p-value |
|----------------|---------------|------------------|---------------------|
| Australia      | 0.0000        | 0.0010           | 0.0010              |
| Austria        | 0.0035        | 0.0050           | 0.0050              |
| Brazil         | 0.0000        | 0.0010           | 0.0010              |
| France         | 0.0001        | 0.0010           | 0.0020              |
| Germany        | 0.0000        | 0.0010           | 0.0010              |
| Italy          | 0.0000        | 0.0010           | 0.0010              |
| New Zealand    | 0.0000        | 0.0010           | 0.0010              |
| Poland         | 0.0000        | 0.0010           | 0.0010              |
| Spain          | 0.0002        | 0.0010           | 0.0030              |
| Sweden         | 0.0000        | 0.0010           | 0.0010              |
| United Kingdom | 0.0000        | 0.0010           | 0.0010              |
| United States  | 0.0000        | 0.0010           | 0.0010              |

*Note: Default options from the rwolf package was used, with the number of repetitions set at 1000.*

**Table D.5.** Romano-Wolf test for the “Social Distance” item

|                | Model p-value | Resample p-value | Romano-Wolf p-value |
|----------------|---------------|------------------|---------------------|
| Australia      | 0.0000        | 0.0010           | 0.0010              |
| Austria        | 0.0000        | 0.0010           | 0.0010              |
| Brazil         | 0.0000        | 0.0010           | 0.0010              |
| France         | 0.0000        | 0.0010           | 0.0010              |
| Germany        | 0.0000        | 0.0010           | 0.0010              |
| Italy          | 0.0000        | 0.0010           | 0.0010              |
| New Zealand    | 0.0000        | 0.0010           | 0.0010              |
| Poland         | 0.0000        | 0.0010           | 0.0010              |
| Spain          | 0.0000        | 0.0010           | 0.0010              |
| Sweden         | 0.0000        | 0.0010           | 0.0010              |
| United Kingdom | 0.0000        | 0.0010           | 0.0010              |
| United States  | 0.0000        | 0.0010           | 0.0010              |

*Note: Default options from the rwolf package was used, with the number of repetitions set at 1000.*
